# Supplementary material for: Association of Asian Dust with daily medical consultations for pollinosis in Fukuoka City, Japan
Source: PubMed Central journal article supplement (PMC5664566; doi:10.1186/s12199-017-0623-x), 2017-04-04
Supplement: 12199_2017_623_MOESM1_ESM.pdf [file 12199_2017_623_MOESM1_ESM.pdf]

## Supplementary Data

Table S1

Regression<sup>a</sup> coefficients (beta), standard errors (SE) and *P*-values for the Asian dust (AD) indicator variable, pollen concentration, interaction between AD and pollen, suspended particulate matter (SPM) and interaction between AD and SPM, by each clinic in Fukuoka City, Japan.

| Clinic and lag period for AD <sup>b</sup> | AD    |       |                 | Pollen <sup>c</sup> |       |                 | AD × Pollen interaction |       |                 |
|-------------------------------------------|-------|-------|-----------------|---------------------|-------|-----------------|-------------------------|-------|-----------------|
|                                           | beta  | SE    | <i>P</i> -value | beta                | SE    | <i>P</i> -value | beta                    | SE    | <i>P</i> -value |
| Clinic I                                  |       |       |                 |                     |       |                 |                         |       |                 |
| Lag 0                                     | 0.324 | 0.143 | 0.02            | 0.302               | 0.011 | < 0.01          | -0.063                  | 0.027 | 0.02            |
| Lag 1                                     | 0.596 | 0.152 | < 0.01          | 0.308               | 0.011 | < 0.01          | -0.116                  | 0.026 | < 0.01          |
| Lag 2                                     | 0.615 | 0.157 | < 0.01          | 0.302               | 0.011 | < 0.01          | -0.080                  | 0.028 | < 0.01          |
| Lag 3                                     | 0.487 | 0.155 | < 0.01          | 0.312               | 0.011 | < 0.01          | -0.124                  | 0.026 | < 0.01          |
| Lag 4                                     | 0.640 | 0.153 | < 0.01          | 0.314               | 0.011 | < 0.01          | -0.137                  | 0.025 | < 0.01          |
| Lag 5                                     | 0.535 | 0.159 | < 0.01          | 0.309               | 0.011 | < 0.01          | -0.100                  | 0.027 | < 0.01          |
| Lag 6                                     | 0.596 | 0.150 | < 0.01          | 0.308               | 0.011 | < 0.01          | -0.115                  | 0.029 | < 0.01          |
| Lag 0-5                                   | 0.365 | 0.104 | < 0.01          | 0.324               | 0.012 | < 0.01          | -0.086                  | 0.018 | < 0.01          |
| Clinic II                                 |       |       |                 |                     |       |                 |                         |       |                 |
| Lag 0                                     | 0.102 | 0.127 | 0.42            | 0.179               | 0.010 | < 0.01          | -0.029                  | 0.025 | 0.24            |
| Lag 1                                     | 0.022 | 0.150 | 0.89            | 0.180               | 0.010 | < 0.01          | -0.026                  | 0.025 | 0.30            |
| Lag 2                                     | 0.011 | 0.146 | 0.94            | 0.177               | 0.010 | < 0.01          | -0.009                  | 0.026 | 0.74            |
| Lag 3                                     | 0.201 | 0.146 | 0.17            | 0.185               | 0.010 | < 0.01          | -0.069                  | 0.024 | < 0.01          |
| Lag 4                                     | 0.189 | 0.145 | 0.19            | 0.186               | 0.010 | < 0.01          | -0.070                  | 0.023 | < 0.01          |
| Lag 5                                     | 0.115 | 0.141 | 0.41            | 0.183               | 0.010 | < 0.01          | -0.056                  | 0.025 | 0.02            |
| Lag 6                                     | 0.001 | 0.134 | 0.99            | 0.178               | 0.010 | < 0.01          | -0.003                  | 0.025 | 0.90            |
| Lag 0-5                                   | 0.114 | 0.093 | 0.22            | 0.189               | 0.011 | < 0.01          | -0.039                  | 0.017 | 0.02            |
| Clinic III                                |       |       |                 |                     |       |                 |                         |       |                 |
| Lag 0                                     | 0.113 | 0.124 | 0.36            | 0.289               | 0.010 | < 0.01          | -0.062                  | 0.024 | < 0.01          |
| Lag 1                                     | 0.048 | 0.136 | 0.72            | 0.291               | 0.010 | < 0.01          | -0.080                  | 0.024 | < 0.01          |
| Lag 2                                     | 0.179 | 0.136 | 0.19            | 0.291               | 0.010 | < 0.01          | -0.090                  | 0.025 | < 0.01          |
| Lag 3                                     | 0.241 | 0.138 | 0.08            | 0.296               | 0.010 | < 0.01          | -0.103                  | 0.023 | < 0.01          |
| Lag 4                                     | 0.182 | 0.134 | 0.17            | 0.297               | 0.010 | < 0.01          | -0.096                  | 0.022 | < 0.01          |
| Lag 5                                     | 0.141 | 0.131 | 0.28            | 0.293               | 0.010 | < 0.01          | -0.077                  | 0.023 | < 0.01          |
| Lag 6                                     | 0.165 | 0.126 | 0.19            | 0.290               | 0.010 | < 0.01          | -0.063                  | 0.023 | < 0.01          |
| Lag 0-5                                   | 0.155 | 0.092 | 0.09            | 0.306               | 0.011 | < 0.01          | -0.071                  | 0.016 | < 0.01          |
| Clinic IV                                 |       |       |                 |                     |       |                 |                         |       |                 |
| Lag 0                                     | 0.366 | 0.245 | 0.14            | 0.381               | 0.021 | < 0.01          | -0.135                  | 0.047 | < 0.01          |
| Lag 1                                     | 0.778 | 0.247 | < 0.01          | 0.391               | 0.021 | < 0.01          | -0.153                  | 0.044 | < 0.01          |
| Lag 2                                     | 0.833 | 0.259 | < 0.01          | 0.390               | 0.021 | < 0.01          | -0.152                  | 0.047 | < 0.01          |
| Lag 3                                     | 0.599 | 0.261 | 0.02            | 0.398               | 0.021 | < 0.01          | -0.178                  | 0.043 | < 0.01          |
| Lag 4                                     | 0.498 | 0.254 | 0.05            | 0.408               | 0.021 | < 0.01          | -0.227                  | 0.044 | < 0.01          |
| Lag 5                                     | 0.218 | 0.260 | 0.40            | 0.399               | 0.021 | < 0.01          | -0.153                  | 0.045 | < 0.01          |
| Lag 6                                     | 0.504 | 0.258 | 0.05            | 0.399               | 0.021 | < 0.01          | -0.164                  | 0.048 | < 0.01          |
| Lag 0-5                                   | 0.705 | 0.185 | < 0.01          | 0.429               | 0.023 | < 0.01          | -0.157                  | 0.032 | < 0.01          |

<sup>a</sup> Adjusted for the day of the week, public holidays, month, year, and the natural cubic splines of daily mean temperature and relative humidity with 3 degrees of freedom.

<sup>b</sup> Delayed effects longer than a day were constrained as mean.

<sup>c</sup> Cubic-root transformed.

Table S1 cont.

| Clinic and lag period for AD <sup>b</sup> | SPM    |       |                 | AD × SPM interaction |       |                 |
|-------------------------------------------|--------|-------|-----------------|----------------------|-------|-----------------|
|                                           | beta   | SE    | <i>P</i> -value | beta                 | SE    | <i>P</i> -value |
| Clinic I                                  |        |       |                 |                      |       |                 |
| Lag 0                                     | -0.003 | 0.002 | 0.04            | -0.002               | 0.003 | 0.43            |
| Lag 1                                     | -0.002 | 0.002 | 0.33            | -0.006               | 0.003 | 0.05            |
| Lag 2                                     | -0.002 | 0.002 | 0.21            | -0.008               | 0.003 | 0.01            |
| Lag 3                                     | -0.003 | 0.002 | 0.09            | -0.003               | 0.003 | 0.31            |
| Lag 4                                     | -0.002 | 0.002 | 0.25            | -0.006               | 0.003 | 0.05            |
| Lag 5                                     | -0.001 | 0.002 | 0.47            | -0.009               | 0.003 | 0.01            |
| Lag 6                                     | -0.002 | 0.002 | 0.24            | -0.010               | 0.004 | < 0.01          |
| Lags 0-5                                  | -0.002 | 0.002 | 0.25            | -0.003               | 0.003 | 0.31            |
| Clinic II                                 |        |       |                 |                      |       |                 |
| Lag 0                                     | -0.003 | 0.001 | 0.05            | -0.001               | 0.003 | 0.70            |
| Lag 1                                     | -0.003 | 0.002 | 0.08            | -0.000               | 0.003 | 0.93            |
| Lag 2                                     | -0.003 | 0.001 | 0.09            | -0.001               | 0.003 | 0.67            |
| Lag 3                                     | -0.002 | 0.001 | 0.10            | -0.002               | 0.003 | 0.57            |
| Lag 4                                     | -0.002 | 0.001 | 0.12            | -0.002               | 0.003 | 0.57            |
| Lag 5                                     | -0.003 | 0.001 | 0.08            | -0.001               | 0.003 | 0.77            |
| Lag 6                                     | -0.002 | 0.001 | 0.08            | -0.004               | 0.003 | 0.21            |
| Lags 0-5                                  | -0.002 | 0.002 | 0.24            | -0.001               | 0.002 | 0.62            |
| Clinic III                                |        |       |                 |                      |       |                 |
| Lag 0                                     | -0.002 | 0.001 | 0.09            | 0.002                | 0.003 | 0.37            |
| Lag 1                                     | -0.001 | 0.002 | 0.34            | 0.002                | 0.003 | 0.37            |
| Lag 2                                     | -0.001 | 0.001 | 0.48            | 0.001                | 0.003 | 0.82            |
| Lag 3                                     | -0.002 | 0.001 | 0.26            | 0.001                | 0.003 | 0.75            |
| Lag 4                                     | -0.002 | 0.001 | 0.17            | 0.002                | 0.003 | 0.47            |
| Lag 5                                     | -0.002 | 0.001 | 0.15            | 0.002                | 0.003 | 0.53            |
| Lag 6                                     | -0.002 | 0.001 | 0.21            | -0.001               | 0.003 | 0.78            |
| Lags 0-5                                  | -0.001 | 0.002 | 0.52            | 0.000                | 0.002 | 0.90            |
| Clinic IV                                 |        |       |                 |                      |       |                 |
| Lag 0                                     | -0.004 | 0.003 | 0.21            | 0.001                | 0.006 | 0.83            |
| Lag 1                                     | -0.001 | 0.003 | 0.72            | -0.007               | 0.006 | 0.25            |
| Lag 2                                     | 0.000  | 0.003 | 0.99            | -0.009               | 0.006 | 0.16            |
| Lag 3                                     | -0.000 | 0.003 | 0.95            | -0.003               | 0.006 | 0.58            |
| Lag 4                                     | -0.001 | 0.003 | 0.73            | 0.001                | 0.006 | 0.80            |
| Lag 5                                     | -0.001 | 0.003 | 0.73            | -0.002               | 0.007 | 0.76            |
| Lag 6                                     | -0.003 | 0.003 | 0.25            | -0.008               | 0.007 | 0.27            |
| Lags 0-5                                  | 0.003  | 0.004 | 0.39            | -0.009               | 0.005 | 0.07            |
