# Supplementary material for: Association of Asian Dust with daily medical consultations for pollinosis in Fukuoka City, Japan
Source: Springer Nature journal article supplement (doi:10.1186/s12199-017-0623-x), 2017-04-04
Supplement: MOESM2 [file 12196304]

Table S2

Regression <sup>a</sup> coefficients (beta), standard errors (SE) and *P*-values for suspended particulate matter (SPM), pollen concentration, and their interaction for four clinics in Fukuoka City, Japan.

| SPM (Lags 0 – 5) <sup>b</sup> | SPM     |        |                 | Pollen <sup>c</sup> |        |                 | SPM × Pollen interaction |        |                 |
|-------------------------------|---------|--------|-----------------|---------------------|--------|-----------------|--------------------------|--------|-----------------|
|                               | beta    | SE     | <i>P</i> -value | beta                | SE     | <i>P</i> -value | beta                     | SE     | <i>P</i> -value |
| Asian-dust affected days      |         |        |                 |                     |        |                 |                          |        |                 |
| Clinic I                      | 0.0096  | 0.0053 | 0.07            | 0.4021              | 0.0811 | < 0.01          | -0.0042                  | 0.0014 | < 0.01          |
| Clinic II                     | 0.0067  | 0.0056 | 0.23            | 0.2242              | 0.0905 | 0.01            | -0.0020                  | 0.0014 | 0.17            |
| Clinic III                    | 0.0049  | 0.0046 | 0.29            | 0.2435              | 0.0704 | < 0.01          | -0.0002                  | 0.0012 | 0.85            |
| Clinic IV                     | -0.0045 | 0.0136 | 0.74            | 0.0444              | 0.1726 | 0.80            | 0.0014                   | 0.0030 | 0.63            |
| Pooled                        | 0.0064  | 0.0029 | 0.03            | 0.2672              | 0.0559 | < 0.01          | -                        | -      | -               |
| Asian-dust-free days          |         |        |                 |                     |        |                 |                          |        |                 |
| Clinic I                      | 0.0076  | 0.0028 | < 0.01          | 0.4479              | 0.0317 | < 0.01          | -0.0042                  | 0.0009 | < 0.01          |
| Clinic II                     | 0.0017  | 0.0024 | 0.48            | 0.2457              | 0.0273 | < 0.01          | -0.0021                  | 0.0008 | < 0.01          |
| Clinic III                    | 0.0072  | 0.0026 | < 0.01          | 0.4178              | 0.0283 | < 0.01          | -0.0038                  | 0.0008 | < 0.01          |
| Clinic IV                     | 0.0126  | 0.0057 | 0.03            | 0.5782              | 0.0573 | < 0.01          | -0.0057                  | 0.0016 | < 0.01          |
| Pooled                        | 0.0061  | 0.0020 | < 0.01          | 0.4172              | 0.0671 | < 0.01          | -                        | -      | -               |

<sup>a</sup> Adjusted for the day of the week, public holidays, month, year, and the natural cubic splines of daily mean temperature and relative humidity with 3 degrees of freedom.

<sup>b</sup> Constrained as mean.

<sup>c</sup> Cubic-root transformed.
